# Supplementary material for: Comparison of Multiparametric Magnetic Resonance Imaging and Targeted Biopsy With Systematic Biopsy Alone for the Diagnosis of Prostate Cancer: A Systematic Review and Meta-analysis
Source: PubMed Central journal article supplement (PMC6686781; doi:10.1001/jamanetworkopen.2019.8427), 2019-08-07
Supplement: jamanetwopen-2-e198427-s001.pdf [file jamanetwopen-2-e198427-s001.pdf]

## Supplementary Online Content

Elwenspoek MMC, Sheppard AL, McInnes MDF, et al. Comparison of multiparametric magnetic resonance imaging and targeted biopsy with systematic biopsy alone for the diagnosis of prostate cancer: a systematic review and meta-analysis. *JAMA Netw Open.* 2019;2(8):e198427. doi:10.1001/jamanetworkopen.2019.8427

**eFigure 1.** The Percentage of Patients in the Prebiopsy MRI Arm With a Negative MRI Result

**eFigure 2.** Prostate Cancers Missed by Prebiopsy MRI Pathways

**eTable 1.** Definitions Used for Clinically Significant Prostate Cancers and Biopsy Methods in Reported Studies

**eTable 2.** Multiparametric Magnetic Resonance Imaging

**eTable 3.** Risk of Bias Assessment

This supplementary material has been provided by the authors to give readers additional information about their work.

**eFigure 1. The Percentage of Patients in the Prebiopsy MRI Arm With a Negative MRI Result**

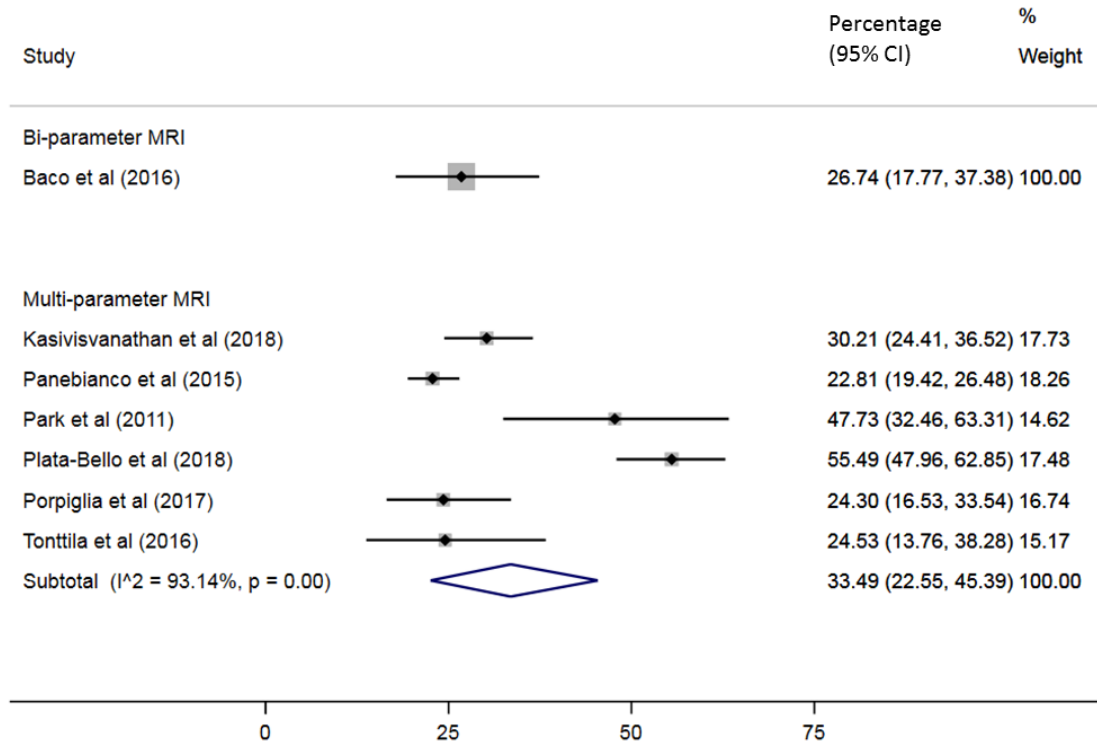

If the pre-biopsy MRI would be used as a triage test, these patients would avoid a biopsy procedure, although some prostate cancers will be missed (see eFigure 2).

**eFigure 2. Prostate Cancers Missed by Prebiopsy MRI Pathways**

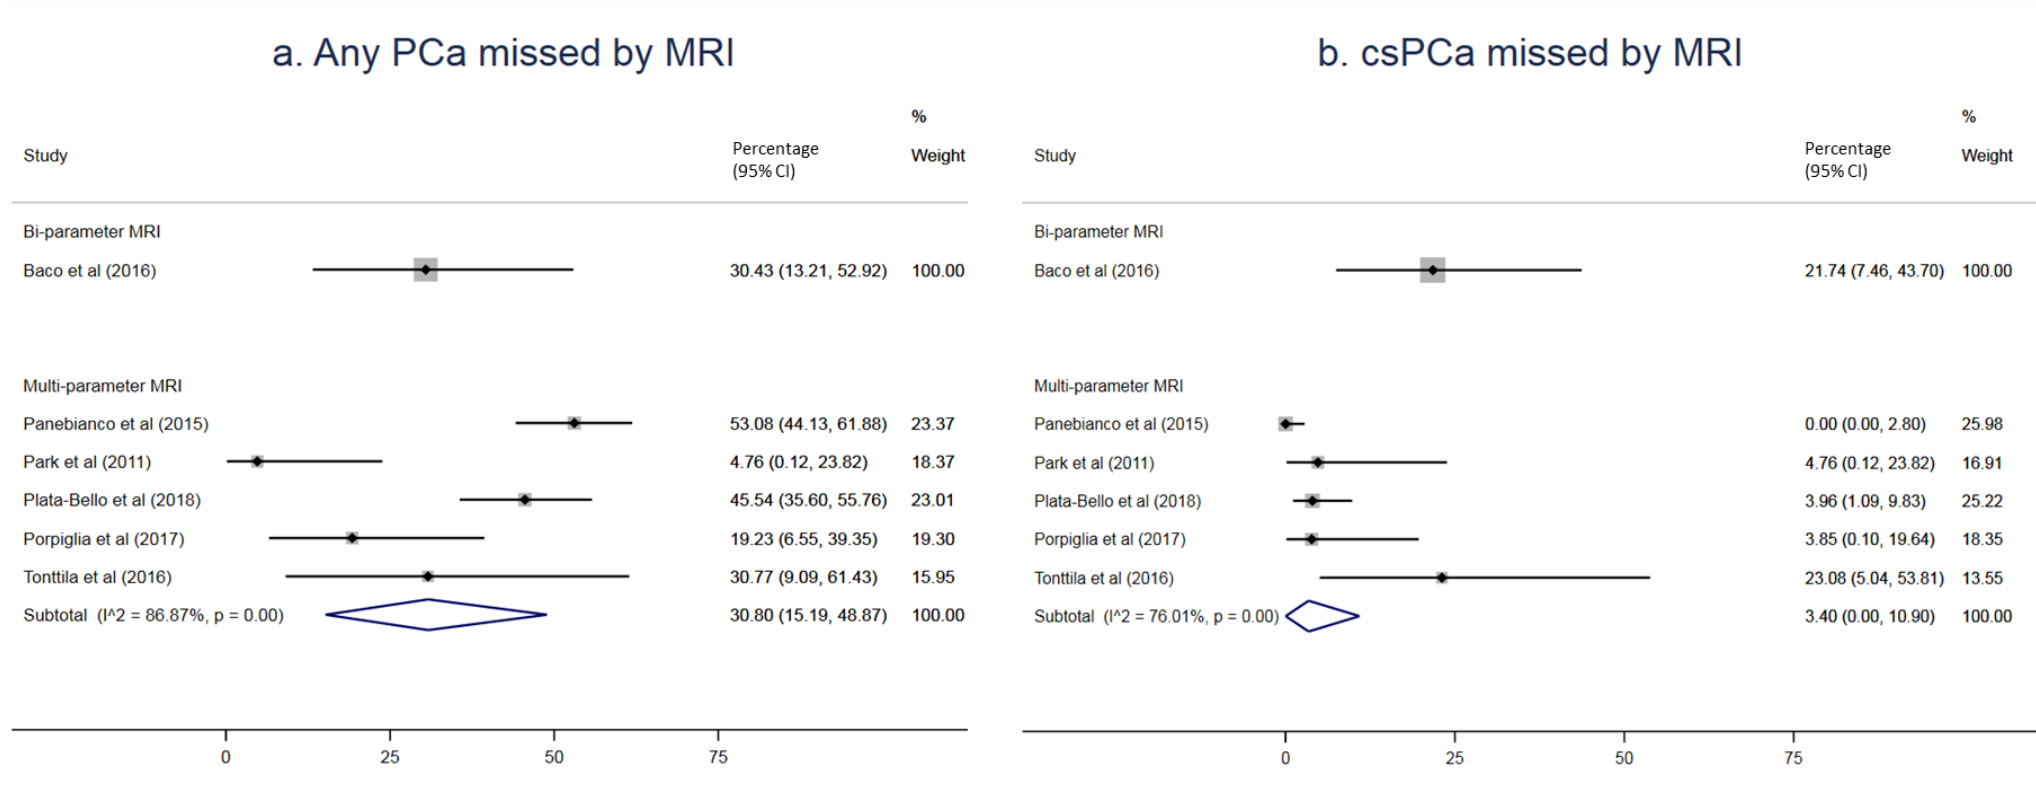

Percentage of patients with a “negative MRI” where at subsequent TRUS-guided systematic biopsy any-grade prostate cancer (a) or clinically significant prostate cancer (b) was detected.

**eTable 1. Definitions Used for Clinically Significant Prostate Cancers and Biopsy Methods in Reported Studies**

| Study                                       | Definition clinically significant                                                                 | Biopsy in standard pathway                                                                     | Targeted biopsy in MRI pathway                                                                                                                                                                                       |
|---------------------------------------------|---------------------------------------------------------------------------------------------------|------------------------------------------------------------------------------------------------|----------------------------------------------------------------------------------------------------------------------------------------------------------------------------------------------------------------------|
| Baco (2016), <sup>20</sup><br>Norway        | Max CCL $\geq 5$ mm for Gleason score 6 disease or any max CCL for Gleason score $\geq 7$ disease | 12 cores<br>Transrectal approach<br>Ultrasound-guided<br>Systematic biopsy                     | 2 cores<br>Transrectal approach<br>MRI-US image fusion guidance<br>Targeted biopsy                                                                                                                                   |
| Kasivisvanathan (2018), <sup>21</sup><br>UK | Presence of a single biopsy core indicating disease of GS $\geq 7$                                | 10-12 cores<br>Transrectal approach<br>Ultrasound-guided<br>Systematic biopsy                  | Maximum of 4 cores were obtained from a maximum of 3 areas suggestive of PCa<br>Transrectal or transperineal approach<br>Cognitive or MRI-US image fusion guidance (according to local expertise)<br>Targeted biopsy |
| Panebianco (2015), <sup>22</sup><br>Italy   | Not reported*                                                                                     | 14 cores<br>Transrectal approach<br>Ultrasound-guided<br>Systematic biopsy                     | 2 cores from the two areas most suggestive of PCa<br>Transrectal approach<br>Not reported under what guidance<br>Targeted biopsy                                                                                     |
| Park (2011), <sup>23</sup><br>Korea         | Gleason score $\geq 6$ and "histologically confirmed with adenocarcinoma"                         | 10-12 cores<br>Transrectal approach<br>Ultrasound-guided<br>Systematic biopsy                  | Maximum of 3 cores<br>Transrectal approach<br>Cognitive guidance<br>Targeted biopsy                                                                                                                                  |
| Plata-Bello (2018), <sup>26</sup><br>Spain  | Any Gleason score $\geq 7$ or CCL $\geq 5$ mm                                                     | Number of cores not reported<br>Transrectal approach<br>Ultrasound-guided<br>Systematic biopsy | Number of cores not reported<br>Transrectal approach<br>MRI-US image fusion guidance<br>Targeted biopsy                                                                                                              |
| Porpiglia (2017), <sup>24</sup><br>Italy    | Any Gleason score $\geq 7$ or max CCL $\geq 5$ mm                                                 | 12 cores<br>Transrectal approach<br>Ultrasound-guided<br>Systematic biopsy                     | 3-6 cores were obtained from a maximum of 2 areas suggestive of PCa<br>Transrectal or transperineal approach (based on the location of the lesion)<br>MRI-US image fusion guidance<br>Targeted biopsy                |
| Tonttila (2016), <sup>25</sup><br>Finland   | Gleason score $\geq 7$ , more than two positive cores, or max CCL $\geq 3$ mm                     | 10-12 cores<br>Transrectal approach<br>Ultrasound-guided<br>Systematic biopsy                  | 1-2 cores were obtained from a maximum of 2 areas suggestive of PCa<br>Transrectal approach<br>Cognitive guidance<br>Targeted biopsy                                                                                 |

\*Definition used to extract data: number of csPCa = number of patients who received treatment; number of non-significant PCa = number of patients who received active surveillance  
Abbreviations: CCL, cancer core length; csPCa, clinically significant prostate cancer; GS, Gleason score; PCa, prostate cancer; SB, standard biopsy; TRUS, transrectal ultrasound; US, ultrasound.

**eTable 2. Multiparametric Magnetic Resonance Imaging**

| Study                                    | Field strength of the magnet | Coils used (e.g. pelvic, endorectal)                                                          | Sequences used (parameters)                                      | Reporting method used                       | Definition of positive MRI results               | Experience radiologist interpreting MRI images                                                                              |
|------------------------------------------|------------------------------|-----------------------------------------------------------------------------------------------|------------------------------------------------------------------|---------------------------------------------|--------------------------------------------------|-----------------------------------------------------------------------------------------------------------------------------|
| Baco (2016), <sup>20</sup> Norway        | 1.5-T                        | None used                                                                                     | bpMRI: T2-weighted and DWI                                       | PI-RADS v1                                  | PI-RADS score $\geq 3$                           | The images were interpreted by one radiologist with experience of greater than 1000 MRI-prostate at the start of this study |
| Kasivisvanathan (2018), <sup>21</sup> UK | 1.5-T or 3.0-T               | Pelvic phased-array coil, with or without endorectal coil                                     | mpMRI: T2-weighted, DCE, and DWI                                 | PI-RADS v2                                  | PI-RADS score $\geq 3$                           | Median of 5 years of experience (IQR 4.5-10)<br>Median of 300 prostate MRIs reported per year (IQR 200-500)                 |
| Panebianco (2015), <sup>22</sup> Italy   | 3.0-T                        | Phased-array coil and endorectal coil                                                         | mpMRI: T2-weighted, DCE, and DWI                                 | PI-RADS v1                                  | "Suspicious lesion detected by mpMRI"            | The images were evaluated in consensus by 2 genitourinary radiologists, with 13 and 4 years of experience                   |
| Park (2011), <sup>23</sup> Korea         | 3.0-T                        | Not reported                                                                                  | mpMRI: T2-weighted, DCE, and DWI                                 | Not reported                                | A target visualized by any of the MRI parameters | The images were assessed by consensus by two radiologists with more than 7 years of experience                              |
| Plata-Bello (2018), <sup>26</sup> Spain  | 3.0-T                        | Transrectal coil                                                                              | mpMRI: T1- and T2-weighted, DCE, and DWI                         | PI-RADS (unclear which version)             | PI-RADS score $\geq 4$                           | Images were interpreted by a radiologist with >10 years of experience in prostate MRI                                       |
| Porpiglia (2017), <sup>24</sup> Italy    | 1.5-T                        | 32-channel phase array coil or four-channel phase array coil combined with an endorectal coil | mpMRI: T2-weighted, DCE, and DWI                                 | PI-RADS v1                                  | PI-RADS score $\geq 3$                           | Three experienced radiologists analyzed the mpMRI findings (level of experience not reported)                               |
| Tonttila (2016), <sup>25</sup> Finland   | 3.0-T                        | Body and spine matrix surface coils                                                           | mpMRI: T1-weighted axial and T2-weighted triplanar, DCE, and DWI | Scores 1-4, indicating likelihood of cancer | Any target visible on MRI (score 2-4)            | The images were independently interpreted by two experienced body radiologists                                              |

Abbreviations: bpMRI, biparametric MRI; DCE, dynamic contrast-enhanced; DWI, diffusion-weighted imaging; IQR, interquartile range; mpMRI, multi-parametric MRI; PI-RADS, prostate imaging reporting and data system.

**eTable 3. Risk of Bias Assessment**

| <b>Study</b>                             | <b>Randomization process</b> | <b>Deviations from intended interventions</b> | <b>Missing outcome data</b> | <b>Measurement of the outcome</b> | <b>Selection of the reported result</b> | <b>Overall Bias</b> |
|------------------------------------------|------------------------------|-----------------------------------------------|-----------------------------|-----------------------------------|-----------------------------------------|---------------------|
| Baco (2016), <sup>20</sup> Norway        | Low                          | Low                                           | Low                         | Low                               | Low                                     | Low                 |
| Kasivisvanathan (2018), <sup>21</sup> UK | Low                          | Low                                           | Low                         | Low                               | Low                                     | Low                 |
| Panebianco (2015), <sup>22</sup> Italy   | Some concerns                | Low                                           | Low                         | Low                               | Low                                     | Some concerns       |
| Park (2011), <sup>23</sup> Korea         | Some concerns                | Low                                           | Low                         | Low                               | Low                                     | Low                 |
| Plata-Bello (2018), <sup>26</sup> Spain  | Some concerns                | Some concerns                                 | Some concerns               | Low                               | Low                                     | Some concerns       |
| Porpiglia (2017), <sup>24</sup> Italy    | Low                          | Low                                           | Low                         | Low                               | Low                                     | Low                 |
| Tonttila (2016), <sup>25</sup> Finland   | Low                          | Low                                           | Low                         | Low                               | Low                                     | Low                 |
